# Supplementary material for: Low Indirect Land Use Change (ILUC) Energy Crops to Bioenergy and Biofuels—A Review
Source: MDPI journal article supplement (doi:10.3390/en15124348), 2022-06-14
Supplement: s1 [file s1]

# Low Indirect Land Use Change (ILUC) Energy Crops to Bioenergy and Biofuels—A Review

Mariana Abreu <sup>1</sup>, Luís Silva <sup>1</sup>, Belina Ribeiro <sup>1</sup>, Alice Ferreira <sup>1</sup>, Luís Alves <sup>1</sup>, Susana M. Paixão <sup>1</sup>, Luísa Gouveia <sup>1</sup>, Patrícia Moura <sup>1</sup>, Florbela Carvalheiro <sup>1</sup>, Luís C. Duarte <sup>1</sup>, Ana Luisa Fernando <sup>2</sup>, Alberto Reis <sup>1,\*</sup> and Francisco Gírio <sup>1</sup>

<sup>1</sup> LNEG—National Laboratory of Energy and Geology, I.P., Bioenergy and Biorefineries Unit, Estrada do Paço do Lumiar, 22, 1649-038 Lisbon, Portugal; info@lneg.pt

<sup>2</sup> MEtRICs, Departamento de Ciências e Tecnologia da Biomassa, NOVA School of Science and Technology, Universidade NOVA de Lisboa, 2829-516 Caparica, Portugal; dctb.secretariado@fct.unl.pt

\* Correspondence: alberto.reis@lneg.pt

The transformation systems vary with several factors like the desired biofuel product, composition of biomass, economics, time and operation conditions from an Microalgal-based biofuels can be obtained through chemical (Table S1), biochemical (Table S2, Table S3 and Table S4) and thermochemical (Table S5, Table S6 and Table S7) conversion pathways [1,2].

**Table S1.** Microalgae raw material studied for chemical conversion (transesterification) pathways towards biofuels.

| Transesterification - Biodiesel |                                                                          |                                                            |                      |           |
|---------------------------------|--------------------------------------------------------------------------|------------------------------------------------------------|----------------------|-----------|
| Microalgae                      | Reaction                                                                 | Conditions                                                 | Yield (%)            | Reference |
| <i>Chlorella protothecoides</i> | Acidic transesterification                                               | 30°C; 7h; 160 rpm<br>M/O = 45:1                            | 68%                  | [3]       |
| <i>Schizochytrium limacinum</i> | Bligh & Dyer extraction-transesterification                              | 90°C; 40 min                                               | 55.5%                | [4]       |
|                                 | <i>In situ</i> transesterification                                       |                                                            | FAME content = 66.4% |           |
|                                 |                                                                          |                                                            | 66.3%                |           |
| <i>Nannochloropsis oculata</i>  | Soxhlet extraction-transesterification                                   | 50°C; 4 h; 1100 rpm<br>M/O = 30:1                          | 97.5%                | [5]       |
| <i>Chlorella pyrenoidosa</i>    | <i>In situ</i> transesterification                                       | 90°C; 2h<br>M/A <sup>1</sup> = 4:1 (v w <sup>-1</sup> )    | 95%                  | [6]       |
| <i>Nannochloropsis gaditana</i> | <i>In situ</i> transesterification                                       | 255°C; 50 min; 70 rpm<br>M/A = 10:1 (v w <sup>-1</sup> )   | 48%                  | [7]       |
| <i>Nannochloropsis</i> sp.      | <i>In situ</i> transesterification                                       | 50°C; 6 h; 1100 rpm<br>M/A = 3.16:100 (w w <sup>-1</sup> ) | 95%                  | [8]       |
| <i>Chlorella vulgaris</i>       | 1st: acidic esterification (radio frequency heating) + hexane extraction | Cell disruption: 90°C; 30 min                              | FAME yield:          | [9]       |
|                                 | 2nd: alkali transesterification (radio frequency heating)                | 55°C; 20 min<br>M/A = 2:5 (v w <sup>-1</sup> )             | 1st: 58.8%           |           |
|                                 |                                                                          |                                                            | 2nd: 79.5%           |           |
| <i>Chlorella vulgaris</i>       | <i>In situ</i> transesterification using IL <sup>2</sup>                 | IL: [P4444][For] <sup>3</sup><br>102.4°C, 4.6 h            | FAME yield:          | [10]      |
|                                 |                                                                          | M/A=9:1 (molar)                                            | Theoretical: 98.0%   |           |
|                                 |                                                                          | IL/A=8:1 (molar)<br>Water content: 40.6%                   | Experimental: 98.6%  |           |

<sup>1</sup> M/A - Methanol to biomass (algae) ratio

<sup>2</sup> IL - Ionic liquids

<sup>3</sup> [P4444][For] - Tetrabutylphosphonium formate.

**Table S2.** Microalgae feedstock applied for biochemical conversion (anaerobic digestion) pathways towards biofuels.

| Anaerobic digestion - Biogas     |                          |                                                                                      |                                             |                                                 |           |
|----------------------------------|--------------------------|--------------------------------------------------------------------------------------|---------------------------------------------|-------------------------------------------------|-----------|
| Microalgae                       | Reaction                 | Organism                                                                             | Conditions                                  | Yield (%)                                       | Reference |
| <i>Chlamydomonas reinhardtii</i> | AD                       | Inoculum: Sludge from a local sewage plant                                           | 38°C; 32 d                                  | 587 ml biogas g <sup>-1</sup> VS (66% methane)  | [11]      |
| <i>Dunaliella salina</i>         | AD                       | Inoculum: Sludge from a local sewage plant                                           | 38°C; 32 d                                  | 505 ml biogas g <sup>-1</sup> VS (64% methane)  | [11]      |
| <i>Chlorella vulgaris</i>        | AD                       | Inoculum: Sludge from a tertiary WW treatment pond                                   | 35°C; 16-28 d                               | 240 ml methane g <sup>-1</sup> VSS <sup>1</sup> | [12]      |
| <i>Phaeodactylum tricornutum</i> | AD                       | Inoculum: Biomass from a full-scale anaerobic digester treating potato-processing WW | 33°C; 30 d; I/M <sup>2</sup> = 3:1          | 360 ml methane g <sup>-1</sup> VS               | [13]      |
| <i>Scenedesmus obliquus</i>      | AD                       | Inoculum: Biomass from a full-scale anaerobic digester treating potato-processing WW | 33°C; 30 d; I/M= 3:1                        | 240 ml methane g <sup>-1</sup> VS               | [13]      |
| <i>Scenedesmus sp.-AMDD</i>      | AD                       | Inoculum: Biomass from a UASB <sup>3</sup> digester with apple processing WW         | 35°C; 34-50 d; 150 rpm; I/M= 3:1            | 410 ml methane g <sup>-1</sup> VS               | [14]      |
| <i>Isochrysis sp.</i>            | AD                       | Inoculum: Biomass from a UASB digester with apple processing WW                      | 35°C; 34–50 d; 150 rpm; I/M= 3:1            | 408 ml methane g <sup>-1</sup> VS               | [14]      |
| <i>Arthrospira platensis</i>     | Co-digestion with sludge | Inoculum: Digested sludge collected from a lab-scale anaerobic reactor               | 35°C; 23 d; I/M=2:1; M/S <sup>4</sup> = 2:1 | 343 ml methane g <sup>-1</sup> VS               | [15]      |

<sup>1</sup> VSS - Volatile Suspended Solids.<sup>2</sup> I/M - Inoculum to microalgae ratio.<sup>3</sup> UASB - Upflow Anaerobic Sludge Blanket.<sup>4</sup> M/S - Microalgae to sludge ratio.**Table S3.** Microalgae feedstock studied for biochemical conversion (alcoholic fermentation) pathways towards biofuels.

| Alcoholic fermentation - Bioethanol      |          |                                       |                                                                        |           |           |
|------------------------------------------|----------|---------------------------------------|------------------------------------------------------------------------|-----------|-----------|
| Microalgae                               | Reaction | Organism                              | Conditions                                                             | Yield (%) | Reference |
| <i>Chlamydomonas reinhardtii</i> UTEX 90 | SHF      | <i>Saccharomyces cerevisiae</i> S288C | 30°C; pH: 5; 24 h; 160 rpm; Yeast: 10 % (v/v)                          | 29.2%     | [16]      |
| <i>Chlorococum sp.</i>                   | SHF      | <i>Saccharomyces bayanus</i>          | 30°C; 60 h; 200 rpm; Substrate: 10 g L <sup>-1</sup> ; Yeast: 3% (v/v) | 38%       | [17]      |
| <i>Chlorella vulgaris</i>                | SHF      | <i>Escherichia coli</i> SJL2526       | 37°C; pH: 7; 24h; 150 rpm; Substrate: 5 g L <sup>-1</sup>              | 40%       | [18]      |

|                                        |            |                                                                                                                                                              |                                                                                                                                        |                                                                                                                                                 |      |
|----------------------------------------|------------|--------------------------------------------------------------------------------------------------------------------------------------------------------------|----------------------------------------------------------------------------------------------------------------------------------------|-------------------------------------------------------------------------------------------------------------------------------------------------|------|
| <i>Schizocytrium</i><br><i>sp.</i>     | SSF        | <i>Escherichia coli</i><br>KO11                                                                                                                              | 37°C; 72 h; 150 rpm                                                                                                                    | 5.5%                                                                                                                                            | [19] |
| <i>Scenedesmus</i><br><i>obliquus</i>  | SHF        | <i>Kluyveromyces</i><br><i>marxianus</i><br>IGC 2671<br><i>Saccharomyces</i><br><i>carlsbergensis</i><br>ATCC 6269<br><i>Saccharomyces</i><br><i>bayanus</i> | 30°C; pH: 5.2; 78 h; 150 rpm;<br>Substrate: 500 ml microalga<br>hydrolysate; Yeast: 300 mg<br>dw <sup>-1</sup> L <sup>-1</sup>         | <i>K. marxianus</i> : 11.7 g L <sup>-1</sup><br><i>S. carlsbergensis</i> : 11.2 g<br>L <sup>-1</sup><br><i>S. bayanus</i> : 9 g L <sup>-1</sup> | [20] |
| <i>Chlorella</i> <i>sp.</i>            | SHF<br>SSF | <i>Zymomonas</i><br><i>mobilis</i><br>ATCC 29191                                                                                                             | 30°C; 60 h; 200 rpm;<br>Substrate: 20 g L <sup>-1</sup> ;<br>Bacterium: 10%<br>(v v <sup>-1</sup> )                                    | SHF: 17.8%<br>SSF: 21.4%                                                                                                                        | [21] |
| <i>Arthrospira</i><br><i>platensis</i> | SHF        | <i>Sacharomyces</i><br><i>cerevisiae</i><br>CAT-1                                                                                                            | 30°C; 20 h;<br>Substrate: 20 g L <sup>-1</sup> ;<br>Bacterium: 10%<br>(v v <sup>-1</sup> )                                             | 83.36%<br>1.57 g L <sup>-1</sup> h <sup>-1</sup> (16h)                                                                                          | [22] |
| <i>Arthrospira</i> <i>sp.</i>          | SHF        | <i>Sacharomyces</i><br><i>cerevisiae</i><br>ATCC 26603                                                                                                       | 30°C; 24 h;<br>B/M <sup>1</sup> : 25% (v v <sup>-1</sup> );<br>Bacterium: 10%<br>(v v <sup>-1</sup> )                                  | 78.9%<br>0.72 g L <sup>-1</sup> h <sup>-1</sup>                                                                                                 | [23] |
| <i>Arthrospira</i> <i>sp.</i>          | SSF        | <i>Sacharomyces</i><br><i>cerevisiae</i><br>CAT-1                                                                                                            | 30°C; 72 h; 130 rpm;<br>Substrate: 20 % (15% corn<br>starch + 5% alga) (w v <sup>-1</sup> );<br>Bacterium: 10%<br>(v v <sup>-1</sup> ) | 55 g L <sup>-1</sup>                                                                                                                            | [24] |

<sup>1</sup> B/M - Biomass to molasses ratio.

**Table S4.** Microalgae feedstock applied for biochemical conversion (biological H<sub>2</sub> production) pathways towards biofuels.

| Biological H <sub>2</sub> production - Biohydrogen |                                     |                                        |                                                                                    |                                                                                                                    |           |
|----------------------------------------------------|-------------------------------------|----------------------------------------|------------------------------------------------------------------------------------|--------------------------------------------------------------------------------------------------------------------|-----------|
| Microalgae                                         | Reaction                            | Organism                               | Conditions                                                                         | Yield (%)                                                                                                          | Reference |
| <i>Chlamydomonas</i><br><i>reinhardtii</i> 137c    | Biophotolysis<br>(S<br>deprivation) | -                                      | 25°C; pH: 7.2; 120 h;<br>I <sup>1</sup> : 110 µmol m <sup>-2</sup> s <sup>-1</sup> | 2.5 ml H <sub>2</sub> L <sup>-1</sup><br>culture h <sup>-1</sup>                                                   | [25]      |
| <i>Chlorella</i><br><i>sorokiniana</i> Ce          | Biophotolysis<br>(S<br>deprivation) | -                                      | 30°C; pH: 7.2; 220 h<br>I: 120 µmol m <sup>-2</sup> s <sup>-1</sup>                | 1.35 ml H <sub>2</sub> L <sup>-1</sup><br>culture h <sup>-1</sup>                                                  | [26]      |
| <i>Chlamydomonas</i><br><i>reinhardtii</i>         | Biophotolysis<br>(S<br>deprivation) | -                                      | 120 h<br>I: 100 µmol m <sup>-2</sup> s <sup>-1</sup>                               | 5.2 ml H <sub>2</sub> L <sup>-1</sup> culture                                                                      | [27]      |
| <i>Chlorella</i><br><i>vulgaris</i>                | Biophotolysis<br>(S<br>deprivation) | -                                      | 27°C; 52 h<br>I: 120 µmol m <sup>-2</sup> s <sup>-1</sup><br>24 h light/48 h dark  | 530 ml H <sub>2</sub> L <sup>-1</sup> culture<br>34.8 ml H <sub>2</sub> L <sup>-1</sup><br>culture h <sup>-1</sup> | [28]      |
| <i>Chlorella</i><br><i>vulgaris</i>                | DF                                  | <i>Clostridium</i><br><i>butyricum</i> | 37°C; 30 h; 220 rpm;<br>Substrate: 5 g L <sup>-1</sup> ;<br>Bacterium: 20%         | 81 ml H <sub>2</sub> g <sup>-1</sup> (dw)                                                                          | [29]      |

| (v v <sup>-1</sup> )         |                               |                                                |                                                                                                                                                                                            |                                                                                                               |      |
|------------------------------|-------------------------------|------------------------------------------------|--------------------------------------------------------------------------------------------------------------------------------------------------------------------------------------------|---------------------------------------------------------------------------------------------------------------|------|
| <i>Nannochloropsis</i> sp.   | DF                            | <i>Enterobacter aerogenes</i>                  | 30°C; 6 h; 220 rpm;<br>Substrate: 2.5 g L <sup>-1</sup> ;<br>Bacterium: 10%<br>(v v <sup>-1</sup> )                                                                                        | 60.6 ml H <sub>2</sub> g <sup>-1</sup> (dw)                                                                   | [30] |
| <i>Chlorella pyrenoidosa</i> | DF                            | Hydrogen producing and photosynthetic bacteria | DF: 35°C; pH: 6;<br>48 h; Substrate: 20 g L <sup>-1</sup> ;<br>PF <sup>2</sup> : 30°C; pH: 8;<br>96 h; Substrate: 15 mM SMPs <sup>3</sup> ;<br>I: 120 µmol m <sup>-2</sup> s <sup>-1</sup> | 198.3 ml g <sup>-1</sup> TVS                                                                                  | [31] |
| <i>Scenedesmus obliquus</i>  | DF                            | <i>Enterobacter aerogenes</i>                  | 30°C; 6 h; 220 rpm;<br>Substrate: 2.5 g L <sup>-1</sup> ;<br>Bacterium: 10%<br>(v v <sup>-1</sup> )                                                                                        | 57.6 ml H <sub>2</sub> g <sup>-1</sup> VS (wet biomass)                                                       | [32] |
| <i>Scenedesmus obliquus</i>  | DF                            | <i>Clostridium butyricum</i>                   | 37°C; 48 h; 150 rpm;<br>Substrate: 50 g L <sup>-1</sup> ;<br>Bacterium: 1% (v v <sup>-1</sup> )                                                                                            | 113.1 ml H <sub>2</sub> g <sup>-1</sup> VS (dried biomass)                                                    | [32] |
| <i>Scenedesmus obliquus</i>  | DF                            | <i>Clostridium butyricum</i>                   | 37°C; 96 h; 150 rpm;<br>Substrate: 50 g L <sup>-1</sup> (dw);<br>Bacterium: 1% (v v <sup>-1</sup> )                                                                                        | 116.3 ml H <sub>2</sub> g <sup>-1</sup> alga                                                                  | [33] |
| <i>Spirogyra</i> sp.         | DF                            | <i>Clostridium butyricum</i> DSM 10702         | 37°C; 144 h; 150 rpm;<br>Substrate: 10 g L <sup>-1</sup> (dw);<br>Bacterium: 1% (v v <sup>-1</sup> )                                                                                       | 47 ml H <sub>2</sub> g <sup>-1</sup> alga <sup>dw</sup><br>156 ml H <sub>2</sub> g <sup>-1</sup> total sugars | [34] |
| <i>Spirogyra</i> sp.         | DF (SBR <sup>4</sup> )        | <i>Clostridium butyricum</i> DSM 10702         | 37°C; 10-14 h; 150 rpm;<br>Substrate: 10 g <sub>sugar</sub> L <sup>-1</sup> ;<br>Bacterium: 10% (v v <sup>-1</sup> )                                                                       | 324 ml H <sub>2</sub> L <sup>-1</sup> h <sup>-1</sup><br>4.4 L H <sub>2</sub> L <sup>-1</sup> FM              | [35] |
| <i>Chlorella</i> sp.         | DF                            | Mixed acidogenic bacteria                      | 35°C; 150 h; pH 7; 150 rpm;<br>Substrate: 80-100 g <sub>VS</sub> L <sup>-1</sup> ;<br>Bacteria: 25% (v v <sup>-1</sup> )                                                                   | 22 ml H <sub>2</sub> g <sup>-1</sup> VS                                                                       | [36] |
| <i>Chlorella vulgaris</i>    | Biophotolysis (S deprivation) | -                                              | 30°C; 120 h; pH 7.5;<br>I (purple light): 140 µmol m <sup>-2</sup> s <sup>-1</sup>                                                                                                         | 60.4 ml H <sub>2</sub> L <sup>-1</sup><br>39.18 ml H <sub>2</sub> L <sup>-1</sup> d <sup>-1</sup>             | [37] |
| <i>Scenedesmus obliquus</i>  | Biophotolysis (S deprivation) | -                                              | 30°C; 120 h; pH 7.5;<br>I (purple light): 140 µmol m <sup>-2</sup> s <sup>-1</sup>                                                                                                         | 128 ml H <sub>2</sub> L <sup>-1</sup><br>204 ml H <sub>2</sub> L <sup>-1</sup> d <sup>-1</sup>                | [37] |

<sup>1</sup> I - Light Intensity.<sup>2</sup> PF - Photo-Fermentation.<sup>3</sup> SMPs - Soluble Metabolite Products.<sup>4</sup> SBR - Sequential Batch Reactor.

**Table S5.** Microalgae raw material studied for thermochemical conversion (gasification) pathways towards biofuels.

| Gasification - Syngas                                                                         |                                     |                                                                           |                                                                                                                                     |           |
|-----------------------------------------------------------------------------------------------|-------------------------------------|---------------------------------------------------------------------------|-------------------------------------------------------------------------------------------------------------------------------------|-----------|
| Microalgae                                                                                    | Reaction                            | Conditions                                                                | Yield                                                                                                                               | Reference |
| <i>Chlorella vulgaris</i>                                                                     | Supercritical water gasification    | 600°C; 240 bar; 2 min; 7.3 wt% loading                                    | 53%                                                                                                                                 | [38]      |
| <i>Nannochloropsis</i> sp.                                                                    | Supercritical water gasification    | 450°C; 40 min; 4.8 wt% loading                                            | 16.3 mmol H <sub>2</sub> g <sup>-1</sup><br>5.1 mmol methane g <sup>-1</sup>                                                        | [39]      |
| <i>Chlorella vulgaris</i>                                                                     | Supercritical water gasification    | 500°C; 36 MPa; 30 min; Catalyst: 1.67M NaOH                               | 12 mmol H <sub>2</sub> g <sup>-1</sup>                                                                                              | [40]      |
| <i>Nannochloropsis oculata</i>                                                                | Steam gasification                  | 700°C; 30 min; Catalyst: Fe <sub>2</sub> O <sub>3</sub> -CeO <sub>2</sub> | 413 cm <sup>3</sup> H <sub>2</sub> g <sup>-1</sup><br>278 cm <sup>3</sup> CO <sub>2</sub> g <sup>-1</sup>                           | [41]      |
| <i>Nannochloropsis gaditana</i>                                                               | Supercritical water gasification    | 663°C; 24 MPa; 128 s; 3-5 wt% loading                                     | 73-97%                                                                                                                              | [42]      |
| <i>Chlorella vulgaris</i>                                                                     | Steam gasification                  | 800°C; 10 min                                                             | 61.7%                                                                                                                               | [43]      |
| <i>Chlorella vulgaris</i>                                                                     | Chemical looping gasification (CLG) | 800°C; 10 min; Oxygen carrier: Fe <sub>2</sub> O <sub>3</sub>             | 81.6%<br>1.05 Nm <sup>3</sup> syngas kg <sup>-1</sup>                                                                               | [43]      |
| <i>Chlorella pyrenoidosa</i>                                                                  | Supercritical water gasification    | 430°C; 2-13 MPa; 60 min                                                   | 5.6 mmol H <sub>2</sub> g <sup>-1</sup><br>8.2 mmol methane g <sup>-1</sup>                                                         | [44]      |
| <i>Chlorella vulgaris</i>                                                                     | Supercritical water gasification    | 385°C; 26 MPa; 30 min; Catalyst: Ru/charcoal                              | 87% C gasification                                                                                                                  | [45]      |
| <i>Chlorella vulgaris</i> (lipid-extracted)<br><i>Arthrospira platensis</i> (lipid-extracted) | Steam gasification                  | 800°C; 10°C min <sup>-1</sup> ; Catalyst: Ni-CaO                          | Yield: 497.29 ml H <sub>2</sub> g <sup>-1</sup><br>Purity: 63.15%<br>Yield: 435 ml H <sub>2</sub> g <sup>-1</sup><br>Purity: 45.78% | [46]      |

**Table S6.** Microalgae feedstock studied for thermochemical conversion (pyrolysis) pathways towards biofuels.

| Pyrolysis - Bio-oil, biochar, biogas |                    |                                                                        |                                                                |           |
|--------------------------------------|--------------------|------------------------------------------------------------------------|----------------------------------------------------------------|-----------|
| Microalgae                           | Reaction           | Conditions                                                             | Yield                                                          | Reference |
| <i>Chlorella protothecoides</i>      | Slow pyrolysis     | 500°C; 5 min                                                           | Bio-oil: 52%                                                   | [47]      |
| <i>Chlorella protothecoides</i>      | Fast pyrolysis     | 450°C; 2-3 s; N <sub>2</sub> Flow = 0.4 m <sup>3</sup> h <sup>-1</sup> | Bio-oil (Autotrophic): 16.6%;<br>Bio-oil (Heterotrophic): 57.9 | [48]      |
| <i>Nannochloropsis</i> sp.           | Slow pyrolysis     | 400°C; 120 min; N <sub>2</sub> Flow: 30 ml min <sup>-1</sup>           | Bio-oil: 31%<br>Biochar: 28%<br>Biogas: 25%                    | [49]      |
| <i>Chlorella</i> sp.                 | Microwave-assisted | 750 W; 20 min;                                                         | Bio-oil: 28.6%                                                 | [50]      |

|                                                                                   | pyrolysis                    | N <sub>2</sub> Flow: 500 ml min <sup>-1</sup> ;<br>Biomass/Char= 1:5 (w w <sup>-1</sup> ) |                                                                   |      |
|-----------------------------------------------------------------------------------|------------------------------|-------------------------------------------------------------------------------------------|-------------------------------------------------------------------|------|
| <i>Chlorella sp.</i>                                                              | Slow pyrolysis               | 450°C; 30 min;<br>Air Flow: 100 ml min <sup>-1</sup>                                      | Bio-oil: 55% (40% energy recovery)<br>Biochar: 30%<br>Biogas: 15% | [51] |
| <i>Chlorella vulgaris</i>                                                         | Microwave-assisted pyrolysis | 1500 W; 20 min;<br>N <sub>2</sub> Flow: 300 ml min <sup>-1</sup>                          | Bio-oil: 35.83%<br>Biochar: 29.87%<br>Biogas: 33%                 | [52] |
| <i>Chlorella vulgaris</i> (lipid-extracted)                                       | Fast pyrolysis               | 500°C                                                                                     | Bio-oil: 53%<br>Biochar: 31%<br>Biogas: 10%                       | [53] |
| <i>Scenedesmus obliquus</i>                                                       | Slow pyrolysis               | 475°C; 30 min;<br>N <sub>2</sub> Flow: 200 ml min <sup>-1</sup>                           | Bio-oil: 57.6%<br>Bio-char: 25.6%<br>Biogas: 16.8%                | [54] |
| <i>Arthrospira platensis</i>                                                      | Slow pyrolysis               | 550°C; 60 min                                                                             | Bio-oil: 35%<br>Biochar: 32%<br>Biogas: 12%                       | [55] |
| <i>Nannochloropsis sp.</i><br><i>Tetraselmis sp.</i><br><i>Isochrysis galbana</i> | Fast pyrolysis               | 500°C;<br>N <sub>2</sub> Flow: 3500 ml min <sup>-1</sup>                                  | Bio-oil: 58-66%<br>Biochar: 21-30%<br>Biogas: 13%                 | [56] |
| <i>Chlorella sp.</i>                                                              | Slow pyrolysis               | 550°C; 240 min                                                                            | Bio-oil: 42.81%<br>Biochar: 55%<br>Biogas: 1.14%                  | [57] |

**Table S7.** Microalgae raw material studied for thermochemical conversion (hydrothermal liquefaction) pathways towards biofuels.

| Hydrothermal liquefaction - Bio-oil |              |                |                        |           |
|-------------------------------------|--------------|----------------|------------------------|-----------|
| Microalgae                          | Reaction     | Conditions     | Yield                  | Reference |
| <i>Botryococcus braunii</i>         | Liquefaction | 300°C; 60 min  | 57%                    | [58]      |
| <i>Dunaliella tertiolecta</i>       | Liquefaction | 300°C; 5 min   | 43.8% (organic basis)  | [59]      |
| <i>Nannochloropsis sp.</i>          | Liquefaction | 350°C; 60 min  | 43 wt%                 | [60]      |
| <i>Nannochloropsis sp.</i>          | Liquefaction | 350°C; 60 min  | 57%                    | [61]      |
| <i>Chlorella vulgaris</i>           | Liquefaction | 350°C; 60 min  | 35.8% daf <sup>1</sup> | [62]      |
| <i>Nannochloropsis oculata</i>      |              |                | 34.3% daf              |           |
| <i>Porphyridium creuntum</i>        |              |                | 21% daf                |           |
| <i>Arthrospira sp.</i>              |              |                | 29% daf                |           |
| <i>Desmodesmus sp.</i>              | Liquefaction | 375°C; 5 min   | 49%                    | [63]      |
| <i>Nannochloropsis sp.</i>          | Liquefaction | 600°C; 1 min   | 66%                    | [64]      |
| <i>Chlorella sp.</i>                | Liquefaction | 350°C; 1.4 min | 39.7% daf              | [65]      |
| <i>Scenedesmus obliquus</i>         | Liquefaction | 300°C; 15 min  | 44% daf                | [66]      |
| <i>Tetraselmis sp.</i>              | Liquefaction | 350°C; 30 min  | 31%                    | [67]      |
| <i>Haematococcus pluvialis</i>      | Liquefaction | 200°C; 150 min | 54.2%                  | [68]      |

<sup>1</sup> daf - dry ash free basis.

## References

1. Raheem, A.; Wan Azlina, W.A.K.G.; Taufiq Yap, Y.H.; Danquah, M.K.; Harun, R. Thermochemical conversion of microalgal biomass for biofuel production. *Renew. Sustain. Energy Rev.* **2015**, *49*, 990–999.
2. Brennan, L.; Owende, P. Biofuels from microalgae-A review of technologies for production, processing, and extractions of biofuels and co-products. *Renew. Sustain. Energy Rev.* **2010**, *14*, 557–577.
3. Miao, X.; Wu, Q. Biodiesel production from heterotrophic microalgal oil. *Bioresour. Technol.* **2006**, *97*, 841–846.
4. Johnson, M.B.; Wen, Z. Production of biodiesel fuel from the microalga *schizochytrium limacinum* by direct transesterification of algal biomass. *Energy and Fuels* **2009**, *23*, 5179–5183.
5. Umdu, E.S.; Tuncer, M.; Seker, E. Transesterification of *Nannochloropsis oculata* microalga's lipid to biodiesel on Al<sub>2</sub>O<sub>3</sub> supported CaO and MgO catalysts. *Bioresour. Technol.* **2009**, *100*, 2828–2831.
6. Li, P.; Miao, X.; Li, R.; Zhong, J. In situ biodiesel production from fast-growing and high oil content *Chlorella pyrenoidosa* in rice straw hydrolysate. *J. Biomed. Biotechnol.* **2011**, 1–8.
7. Jazzar, S.; Olivares-Carrillo, P.; Pérez de los Ríos, A.; Marzouki, M.N.; Ación-Fernández, F.G.; Fernández-Sevilla, J.M.; Molina-Grima, E.; Smaali, I.; Quesada-Medina, J. Direct supercritical methanolysis of wet and dry unwashed marine microalgae (*Nannochloropsis gaditana*) to biodiesel. *Appl. Energy* **2015**, *148*, 210–219.
8. Gouveia, L.; Janelas, J.; Tropecêlo, A.; Oliveira, A.. Microalga *Nannochloropsis* sp. Biomass for Biodiesel Production: Conventional (Cell Disruption) and in situ Transesterification. *J. Mar. Biol. Oceanogr.* **2016**, *5*, 1–4.
9. Ma, Y.; Liu, S.; Wang, Y.; Adhikari, S.; Dempster, T.A.; Wang, Y. Direct biodiesel production from wet microalgae assisted by radio frequency heating. *Fuel* **2019**, *256*, 115994.
10. Malekghasemi, S.; Kariminia, H.R.; Plechkova, N.K.; Ward, V.C.A. Direct transesterification of wet microalgae to biodiesel using phosphonium carboxylate ionic liquid catalysts. *Biomass and Bioenergy* **2021**, *150*, 106126.
11. Mussnug, J.H.; Klassen, V.; Schlüter, A.; Kruse, O. Microalgae as substrates for fermentative biogas production in a combined biorefinery concept. *J. Biotechnol.* **2010**, *150*, 51–56.
12. Ras, M.; Lardon, L.; Bruno, S.; Bernet, N.; Steyer, J.P. Experimental study on a coupled process of production and anaerobic digestion of *Chlorella vulgaris*. *Bioresour. Technol.* **2011**, *102*, 200–206.
13. Zamalloa, C.; Boon, N.; Verstraete, W. Anaerobic digestibility of *Scenedesmus obliquus* and *Phaeodactylum tricornutum* under mesophilic and thermophilic conditions. *Appl. Energy* **2012**, *92*, 733–738.
14. Frigon, J.C.; Matteau-Lebrun, F.; Hamani Abdou, R.; McGinn, P.J.; O'Leary, S.J.B.; Guiot, S.R. Screening microalgae strains for their productivity in methane following anaerobic digestion. *Appl. Energy* **2013**, *108*, 100–107.
15. Du, X.; Tao, Y.; Liu, Y.; Li, H. Stimulating methane production from microalgae by alkaline pretreatment and co-digestion with sludge. *Environ. Technol.* **2018**, *41*, 1546–1553.
16. Nguyen, M.T.; Choi, S.P.; Lee, J.; Lee, J.H.; Sim, S.J. Hydrothermal acid pretreatment of *Chlamydomonas reinhardtii* biomass for ethanol production. *J. Microbiol. Biotechnol.* **2009**, *19*, 161–166.
17. Harun, R.; Danquah, M.K.; Forde, G.M. Microalgal biomass as a fermentation feedstock for bioethanol production. *J. Chem. Technol. Biotechnol.* **2010**, *85*, 199–203.
18. Lee, S.; Oh, Y.; Kim, D.; Kwon, D.; Lee, C.; Lee, J. Converting carbohydrates extracted from marine algae into ethanol using various ethanolic *Escherichia coli* strains. *Appl. Biochem. Biotechnol.* **2011**, *164*, 878–888.
19. Kim, J.K.; Um, B.H.; Kim, T.H. Bioethanol production from micro-algae, *Schizochytrium* sp., using hydrothermal treatment and biological conversion. *Korean J. Chem. Eng.* **2012**, *29*, 209–214.
20. Miranda, J.R.; Passarinho, P.C.; Gouveia, L. Bioethanol production from *Scenedesmus obliquus* sugars: The influence of photobioreactors and culture conditions on biomass production. *Appl. Microbiol. Biotechnol.* **2012**, *96*, 555–564.

21. Ho, S.H.; Huang, S.W.; Chen, C.Y.; Hasunuma, T.; Kondo, A.; Chang, J.S. Bioethanol production using carbohydrate-rich microalgae biomass as feedstock. *Bioresour. Technol.* **2013**, *135*, 191–198.
22. Rempel, A.; de Souza Sossella, F.; Margarites, A.C.; Astolfi, A.L.; Steinmetz, R.L.R.; Kunz, A.; Treichel, H.; Colla, L.M. Bioethanol from *Spirulina platensis* biomass and the use of residuals to produce biomethane: An energy efficient approach. *Bioresour. Technol.* **2019**, *288*, 121588.
23. Cardias, B.B.; Trevisol, T.C.; Bertuol, G.G.; Costa, J.A.V.; Santos, L.O. Hydrolyzed *Spirulina* Biomass and Molasses as Substrate in Alcoholic Fermentation with Application of Magnetic Fields. *Waste Biomass Valorization* **2020**, *12*, 175–183.
24. Luiza Astolfi, A.; Rempel, A.; Cavanhi, V.A.F.; Alves, M.; Deamici, K.M.; Colla, L.M.; Costa, J.A.V. Simultaneous saccharification and fermentation of *Spirulina* sp. and corn starch for the production of bioethanol and obtaining biopeptides with high antioxidant activity. *Bioresour. Technol.* **2020**, *301*, 122698.
25. Zhang, L.; Happe, T.; Melis, A. Biochemical and morphological characterization of sulfur-deprived and H<sub>2</sub>-producing *Chlamydomonas reinhardtii* (green alga). *Planta* **2002**, *214*, 552–561.
26. Chader, S.; Hacene, H.; Agathos, S.N. Study of hydrogen production by three strains of *Chlorella* isolated from the soil in the Algerian Sahara. *Int. J. Hydrogen Energy* **2009**, *34*, 4941–4946.
27. Tamburic, B.; Zemichael, F.W.; Maitland, G.C.; Hellgardt, K. Parameters affecting the growth and hydrogen production of the green alga *Chlamydomonas reinhardtii*. *Int. J. Hydrogen Energy* **2011**, *36*, 7872–7876.
28. Rashid, N.; Lee, K.; Mahmood, Q. Bio-hydrogen production by *Chlorella vulgaris* under diverse photoperiods. *Bioresour. Technol.* **2011**, *102*, 2101–2104.
29. Liu, C.; Chang, C.; Cheng, C.; Lee, D. Fermentative hydrogen production by *Clostridium butyricum* CGS5 using carbohydrate-rich microalgal biomass as feedstock. *Int. J. Hydrogen Energy* **2012**, *37*, 15458–15464.
30. Nobre, B.P.; Villalobos, F.; Barragán, B.E.; Oliveira, A.C.; Batista, A.P.; Marques, P.A.S.S.; Mendes, R.L.; Sovová, H.; Palavra, A.F.; Gouveia, L. A biorefinery from *Nannochloropsis* sp. microalga - Extraction of oils and pigments. Production of biohydrogen from the leftover biomass. *Bioresour. Technol.* **2013**, *135*, 128–136.
31. Xia, A.; Cheng, J.; Ding, L.; Lin, R.; Huang, R.; Zhou, J.; Cen, K. Improvement of the energy conversion efficiency of *Chlorella pyrenoidosa* biomass by a three-stage process comprising dark fermentation, photofermentation, and methanogenesis. *Bioresour. Technol.* **2013**, *146*, 436–443.
32. Batista, A.P.; Moura, P.; Marques, P.A.S.S.; Ortigueira, J.; Alves, L.; Gouveia, L. *Scenedesmus obliquus* as feedstock for biohydrogen production by *Enterobacter aerogenes* and *Clostridium butyricum*. *Fuel* **2014**, *117*, 537–543.
33. Ortigueira, J.; Alves, L.; Gouveia, L.; Moura, P. Third generation biohydrogen production by *Clostridium butyricum* and adapted mixed cultures from *Scenedesmus obliquus* microalga biomass. *Fuel* **2015**, *153*, 128–134.
34. Pacheco, R.; Ferreira, A.F.; Pinto, T.; Nobre, B.P.; Loureiro, D.; Moura, P.; Gouveia, L.; Silva, C.M. The production of pigments & hydrogen through a *Spirogyra* sp. biorefinery. *Energy Convers. Manag.* **2015**, *89*, 789–797.
35. Ortigueira, J.; Pinto, T.; Gouveia, L.; Moura, P. Production and storage of biohydrogen during sequential batch fermentation of *Spirogyra* hydrolyzate by *Clostridium butyricum*. *Energy* **2015**, *88*, 528–536.
36. Usmanbaha, N.; Jariyaboon, R.; Reungsang, A.; Kongjan, P.; Chu, C.-Y. Optimization of Batch Dark Fermentation of *Chlorella* sp. Using Mixed-Cultures for Simultaneous Hydrogen and Butyric Acid Production. *Energies* **2019**, Vol. 12, Page 2529 **2019**, *12*, 2529.
37. Ruiz-Marin, A.; Canedo-López, Y.; Chávez-Fuentes, P. Biohydrogen production by *Chlorella vulgaris* and *Scenedesmus obliquus* immobilized cultivated in artificial wastewater under different light quality. *AMB Express* **2020**, *10*, 1–7.
38. Chakinala, A.G.; Brilman, D.W.F.; Van Swaaij, W.P.M.; Kersten, S.R.A. Catalytic and non-catalytic supercritical water gasification of microalgae and glycerol. *Ind. Eng. Chem. Res.* **2010**, *49*, 1113–1122.



39. Guan, Q.; Wei, C.; Ning, P.; Tian, S.; Gu, J. Catalytic Gasification of Algae *Nannochloropsis* sp. in Sub/Supercritical Water. *Procedia Environ. Sci.* **2013**, *18*, 844–848.
40. Onwudili, J.A.; Lea-Langton, A.R.; Ross, A.B.; Williams, P.T. Catalytic hydrothermal gasification of algae for hydrogen production: Composition of reaction products and potential for nutrient recycling. *Bioresour. Technol.* **2013**, *127*, 72–80.
41. Duman, G.; Uddin, M.A.; Yanik, J. Hydrogen production from algal biomass via steam gasification. *Bioresour. Technol.* **2014**, *166*, 24–30.
42. Caputo, G.; Dispenza, M.; Rubio, P.; Scargiali, F.; Marotta, G.; Brucato, A. Supercritical water gasification of microalgae and their constituents in a continuous reactor. *J. Supercrit. Fluids* **2016**, *118*, 163–170.
43. Liu, G.; Liao, Y.; Wu, Y.; Ma, X.; Chen, L. Characteristics of microalgae gasification through chemical looping in the presence of steam. *Int. J. Hydrogen Energy* **2017**, *42*, 22730–22742.
44. Jiao, J.L.; Wang, F.; Duan, P.G.; Xu, Y.P.; Yan, W.H. Catalytic hydrothermal gasification of microalgae for producing hydrogen and methane-rich gas. *Energy Sources, Part A Recover. Util. Environ. Eff.* **2017**, *39*, 851–860.
45. Tiong, L.; Komiyama, M. Supercritical water gasification of microalga *Chlorella vulgaris* over supported Ru. *J. Supercrit. Fluids* **2019**, *144*, 1–7.
46. Raheem, A.; Cui, X.; Mangi, F.H.; Memon, A.A.; Ji, G.; Cheng, B.; Dong, W.; Zhao, M. Hydrogen-rich energy recovery from microalgae (lipid-extracted) via steam catalytic gasification. *Algal Res.* **2020**, *52*, 102102.
47. Peng, W.; Wu, Q.; Tu, P. Effects of temperature and holding time on production of renewable fuels from pyrolysis of *Chlorella protothecoides*. *J. Appl. Phycol.* **2000**, *12*, 147–152.
48. Miao, X.; Wu, Q. High yield bio-oil production from fast pyrolysis by metabolic controlling of *Chlorella protothecoides*. *J. Biotechnol.* **2004**, *110*, 85–93.
49. Pan, P.; Hu, C.; Yang, W.; Li, Y.; Dong, L.; Zhu, L.; Tong, D.; Qing, R.; Fan, Y. The direct pyrolysis and catalytic pyrolysis of *Nannochloropsis* sp. residue for renewable bio-oils. *Bioresour. Technol.* **2010**, *101*, 4593–4599.
50. Du, Z.; Li, Y.; Wang, X.; Wan, Y.; Chen, Q.; Wang, C.; Lin, X.; Liu, Y.; Chen, P.; Ruan, R. Microwave-assisted pyrolysis of microalgae for biofuel production. *Bioresour. Technol.* **2011**, *102*, 4890–4896.
51. Babich, I. V.; van der Hulst, M.; Lefferts, L.; Moulijn, J.A.; O'Connor, P.; Seshan, K. Catalytic pyrolysis of microalgae to high-quality liquid bio-fuels. *Biomass and Bioenergy* **2011**, *35*, 3199–3207.
52. Hu, Z.; Ma, X.; Chen, C. A study on experimental characteristic of microwave-assisted pyrolysis of microalgae. *Bioresour. Technol.* **2012**, *107*, 487–493.
53. Wang, K.; Brown, R.C.; Homsy, S.; Martinez, L.; Sidhu, S.S. Fast pyrolysis of microalgae remnants in a fluidized bed reactor for bio-oil and biochar production. *Bioresour. Technol.* **2013**, *127*, 494–499.
54. Silva, C.M.; Ferreira, A.F.; Dias, A.P.; Costa, M. A comparison between microalgae virtual biorefinery arrangements for bio-oil production based on lab-scale results. *J. Clean. Prod.* **2016**, *130*, 58–67.
55. Jamilatun, S.; Budhijanto, B.; Rochmadi, R.; Yuliestyan, A.; Hadiyanto, H.; Budiman, A. Comparative analysis between pyrolysis products of *Spirulina platensis* biomass and its residues. *Int. J. Renew. Energy Dev.* **2019**, *8*, 133–140.
56. Azizi, K.; Keshavarz Moraveji, M.; Arregi, A.; Amutio, M.; Lopez, G.; Olazar, M. On the pyrolysis of different microalgae species in a conical spouted bed reactor: Bio-fuel yields and characterization. *Bioresour. Technol.* **2020**, *311*, 123561.
57. Aswie, V.; Qadariyah, L.; Mahfud, M. Pyrolysis of Microalgae *Chlorella* sp. using Activated Carbon as Catalyst for Biofuel Production. *Bull. Chem. React. Eng. Catal.* **2021**, *16*, 205–213.
58. Dote, Y.; Sawayama, S.; Inoue, S.; Minowa, T.; Yokoyama, S. Recovery of liquid fuel from hydrocarbon-rich microalgae by thermochemical liquefaction. *Fuel* **1994**, *73*, 1855–1857.
59. Minowa, T.; Yokoyama, S.; Kishimoto, M.; Okakura, T. Oil production from algal cells of *Dunaliella tertiolecta* by direct thermochemical liquefaction. *Fuel* **1995**, *12*, 1735–1738.

- 
60. Brown, T.M.; Duan, P.; Savage, P.E. Hydrothermal liquefaction and gasification of *Nannochloropsis* sp. *Energy and Fuels* **2010**, *24*, 3639–3646.
  61. Duan, P.; Savage, P.E. Hydrothermal liquefaction of a microalga with heterogeneous catalysts. *Ind. Eng. Chem. Res.* **2011**, *50*, 52–61.
  62. Biller, P.; Ross, A.B. Potential yields and properties of oil from the hydrothermal liquefaction of microalgae with different biochemical content. *Bioresour. Technol.* **2011**, *102*, 215–225.
  63. Garcia Alba, L.; Torri, C.; Samorì, C.; Van Der Spek, J.; Fabbri, D.; Kersten, S.R.A.; Brilman, D.W.F. Hydrothermal treatment (HTT) of microalgae: Evaluation of the process as conversion method in an algae biorefinery concept. *Energy and Fuels* **2012**, *26*, 642–657.
  64. Faeth, J.L.; Valdez, P.J.; Savage, P.E. Fast hydrothermal liquefaction of *nannochloropsis* sp. to produce biocrude. *Energy and Fuels* **2013**, *27*, 1391–1398.
  65. Biller, P.; Sharma, B.K.; Kunwar, B.; Ross, A.B. Hydroprocessing of bio-crude from continuous hydrothermal liquefaction of microalgae. *Fuel* **2015**, *159*, 197–205.
  66. Couto, E.A.; Pinto, F.; Varela, F.; Reis, A.; Costa, P.; Calijuri, M.L. Hydrothermal liquefaction of biomass produced from domestic sewage treatment in high-rate ponds. *Renew. Energy* **2018**, *118*, 644–653.
  67. Han, Y.; Hoekman, S.K.; Cui, Z.; Jena, U.; Das, P. Hydrothermal liquefaction of marine microalgae biomass using co-solvents. *Algal Res.* **2019**, *38*, 101421.
  68. Hong, W.; Chen, J.; Ding, Q.; Gao, Y.; Ye, L.; Yin, Y.; Tu, S. Efficient thermochemical liquefaction of microalgae *Haematococcus pluvialis* for production of high quality biocrude with high selectivity over Fe/montmorillonite catalyst. *J. Energy Inst.* **2021**, *97*, 73–79.
